# Supplementary material for: Importing ArrayExpress datasets into R/Bioconductor
Source: PubMed Central journal article supplement — Bioinformatics. 2009 Jun 8;25(16):2092–4. doi: 10.1093/bioinformatics/btp354 (PMC2723004; doi:10.1093/bioinformatics/btp354), 2009-06-08
Supplement: btp354_1.pdf [file btp354_1.pdf]

---

| <b>Breast Cancer Experiments</b>       |       |     |
|----------------------------------------|-------|-----|
| Total                                  | 206   |     |
| Raw only                               | 16    | 8%  |
| Processed only                         | 43    | 21% |
| Raw and Processed                      | 145   | 70% |
| Data not yet available                 | 2     | 1%  |
| <b>Creation of objects on raw data</b> |       |     |
| Success                                | 131   | 81% |
| Column names needed                    | 23    | 15% |
| Failed                                 | 7     | 4%  |
| <b>Array types</b>                     |       |     |
| Affymetrix                             | 127   | 83% |
| One-colour, not Affymetrix             | 5     | 3%  |
| Two-colours                            | 22    | 14% |
| <b>Amount of data</b>                  |       |     |
| Total number of arrays                 | 9353  |     |
| Median number of features per array    | 22640 |     |

---

**Table 1.** Summary of the human breast cancer datasets in ArrayExpress. The sum of the numbers of under 'Array types' is higher than the number of raw datasets because one accession can contain several datasets.
